# Supplementary material for: Lysyl oxidase is essential for hypoxia-induced metastasis
Source: Springer Nature journal article supplement (doi:10.1038/nature04695), 2006-04-27
Supplement: 41586_2006_BFnature04695_MOESM1_ESM.pdf [file 41586_2006_BFnature04695_MOESM1_ESM.pdf]

**Supplementary Table 1: Associations between LOX and clinical criteria in breast cancer patients<sup>10</sup>, determined by Chi Square.**

| Sample size n=295                             | Probability |
|-----------------------------------------------|-------------|
| ER status                                     | p=0.0014    |
| Lymph node status                             | p=0.2679    |
| High Grade (3 v 2 or 1)                       | p=0.1117    |
| Size T1-T2 (T1≤2cm v T2>2cm)                  | p=0.4503    |
| Age (Young <40 v 40-55 yr)                    | p=0.4965    |
| Distant metastasis-free survival              | p=0.1336    |
| Overall survival                              | p=0.0674    |
| Distant metastasis-free survival (ER-ve only) | p=0.0202    |
| Overall survival (ER-ve only)                 | p=0.0149    |
