# Supplementary material for: Lysyl oxidase is essential for hypoxia-induced metastasis
Source: Springer Nature journal article supplement (doi:10.1038/nature04695), 2006-04-27
Supplement: 41586_2006_BFnature04695_MOESM2_ESM.pdf [file 41586_2006_BFnature04695_MOESM2_ESM.pdf]

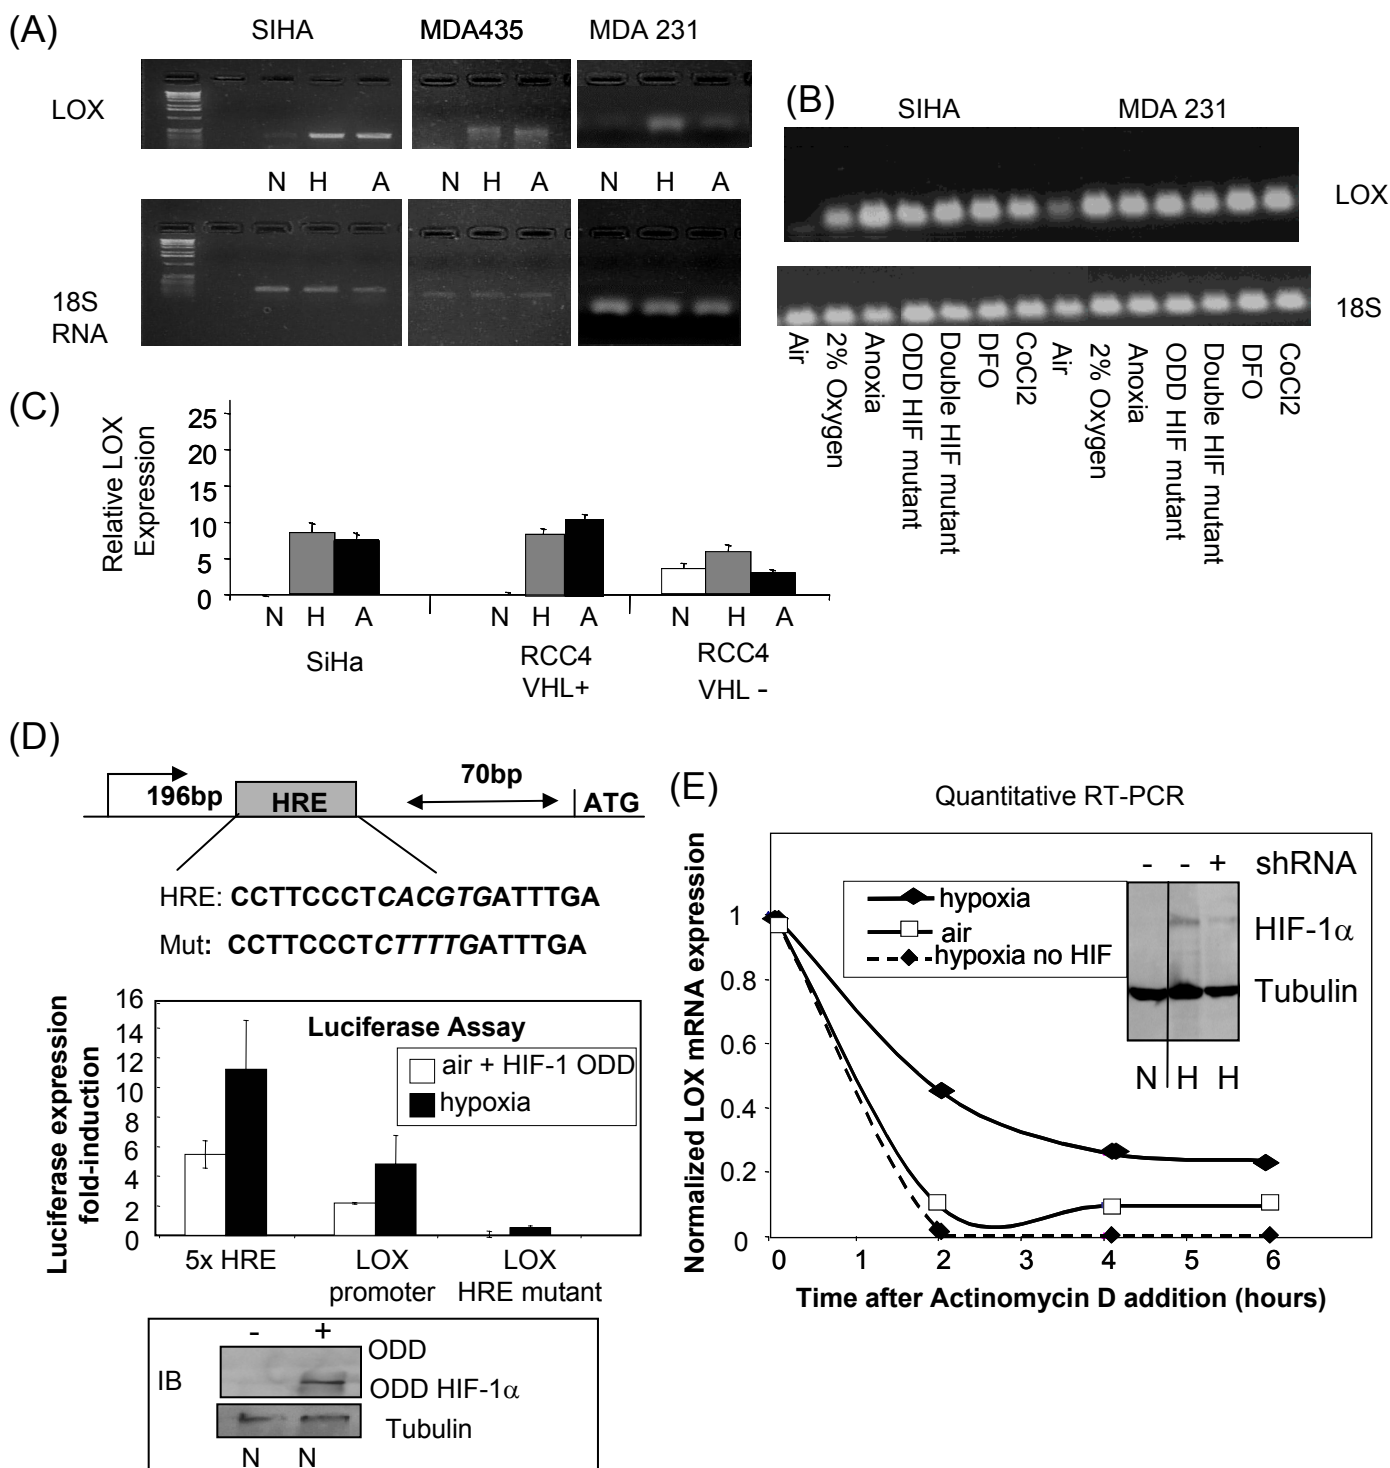

**Supplementary Figure 1: Lysyl oxidase mRNA levels are increased in hypoxia via HIF-1.**

**(A-C)** LOX RT-PCR of normoxic (N), hypoxic (H, 2% O<sub>2</sub>) or anoxic (A, 0.02% O<sub>2</sub>) cells including RCC4 +/- VHL cells. Expression was compared with cells expressing stable HIF-1 mutants or HIF-1 shRNA(+), and with cells treated with DFO or CoCl<sub>2</sub>.

**(D)** LOX promoter studies (see methods for details).

**(E)** QRT-PCR assessed LOX mRNA levels after actinomycin addition. Data plotted as intra-experimental mean  $\pm$  standard error for triplicate readings. Expression levels were compared to those of cells transfected with HIF-1 $\alpha$  targeting shRNA (hypoxia no HIF, "+")IB). Results representative of at least three independent experimental repeats.
