# Supplementary material for: Lysyl oxidase is essential for hypoxia-induced metastasis
Source: Springer Nature journal article supplement (doi:10.1038/nature04695), 2006-04-27
Supplement: 41586_2006_BFnature04695_MOESM3_ESM.pdf [file 41586_2006_BFnature04695_MOESM3_ESM.pdf]

# WHOLE NKI DATA SET

GAD6AIP1.BI.206  
 GAD6AIP1.BI.207  
 GAD6AIP1.BI.208  
 GAD6AIP1.BI.209  
 GAD6AIP1.BI.210  
 GAD6AIP1.BI.211  
 GAD6AIP1.BI.212  
 GAD6AIP1.BI.213  
 GAD6AIP1.BI.214  
 GAD6AIP1.BI.215  
 GAD6AIP1.BI.216  
 GAD6AIP1.BI.217  
 GAD6AIP1.BI.218  
 GAD6AIP1.BI.219  
 GAD6AIP1.BI.220  
 GAD6AIP1.BI.221  
 GAD6AIP1.BI.222  
 GAD6AIP1.BI.223  
 GAD6AIP1.BI.224  
 GAD6AIP1.BI.225  
 GAD6AIP1.BI.226  
 GAD6AIP1.BI.227  
 GAD6AIP1.BI.228  
 GAD6AIP1.BI.229  
 GAD6AIP1.BI.230  
 GAD6AIP1.BI.231  
 GAD6AIP1.BI.232  
 GAD6AIP1.BI.233  
 GAD6AIP1.BI.234  
 GAD6AIP1.BI.235  
 GAD6AIP1.BI.236  
 GAD6AIP1.BI.237  
 GAD6AIP1.BI.238  
 GAD6AIP1.BI.239  
 GAD6AIP1.BI.240  
 GAD6AIP1.BI.241  
 GAD6AIP1.BI.242  
 GAD6AIP1.BI.243  
 GAD6AIP1.BI.244  
 GAD6AIP1.BI.245  
 GAD6AIP1.BI.246  
 GAD6AIP1.BI.247  
 GAD6AIP1.BI.248  
 GAD6AIP1.BI.249  
 GAD6AIP1.BI.250  
 GAD6AIP1.BI.251  
 GAD6AIP1.BI.252  
 GAD6AIP1.BI.253  
 GAD6AIP1.BI.254  
 GAD6AIP1.BI.255  
 GAD6AIP1.BI.256  
 GAD6AIP1.BI.257  
 GAD6AIP1.BI.258  
 GAD6AIP1.BI.259  
 GAD6AIP1.BI.260  
 GAD6AIP1.BI.261  
 GAD6AIP1.BI.262  
 GAD6AIP1.BI.263  
 GAD6AIP1.BI.264  
 GAD6AIP1.BI.265  
 GAD6AIP1.BI.266  
 GAD6AIP1.BI.267  
 GAD6AIP1.BI.268  
 GAD6AIP1.BI.269  
 GAD6AIP1.BI.270  
 GAD6AIP1.BI.271  
 GAD6AIP1.BI.272  
 GAD6AIP1.BI.273  
 GAD6AIP1.BI.274  
 GAD6AIP1.BI.275  
 GAD6AIP1.BI.276  
 GAD6AIP1.BI.277  
 GAD6AIP1.BI.278  
 GAD6AIP1.BI.279  
 GAD6AIP1.BI.280  
 GAD6AIP1.BI.281  
 GAD6AIP1.BI.282  
 GAD6AIP1.BI.283  
 GAD6AIP1.BI.284  
 GAD6AIP1.BI.285  
 GAD6AIP1.BI.286  
 GAD6AIP1.BI.287  
 GAD6AIP1.BI.288  
 GAD6AIP1.BI.289  
 GAD6AIP1.BI.290  
 GAD6AIP1.BI.291  
 GAD6AIP1.BI.292  
 GAD6AIP1.BI.293  
 GAD6AIP1.BI.294  
 GAD6AIP1.BI.295  
 GAD6AIP1.BI.296  
 GAD6AIP1.BI.297  
 GAD6AIP1.BI.298  
 GAD6AIP1.BI.299  
 GAD6AIP1.BI.300

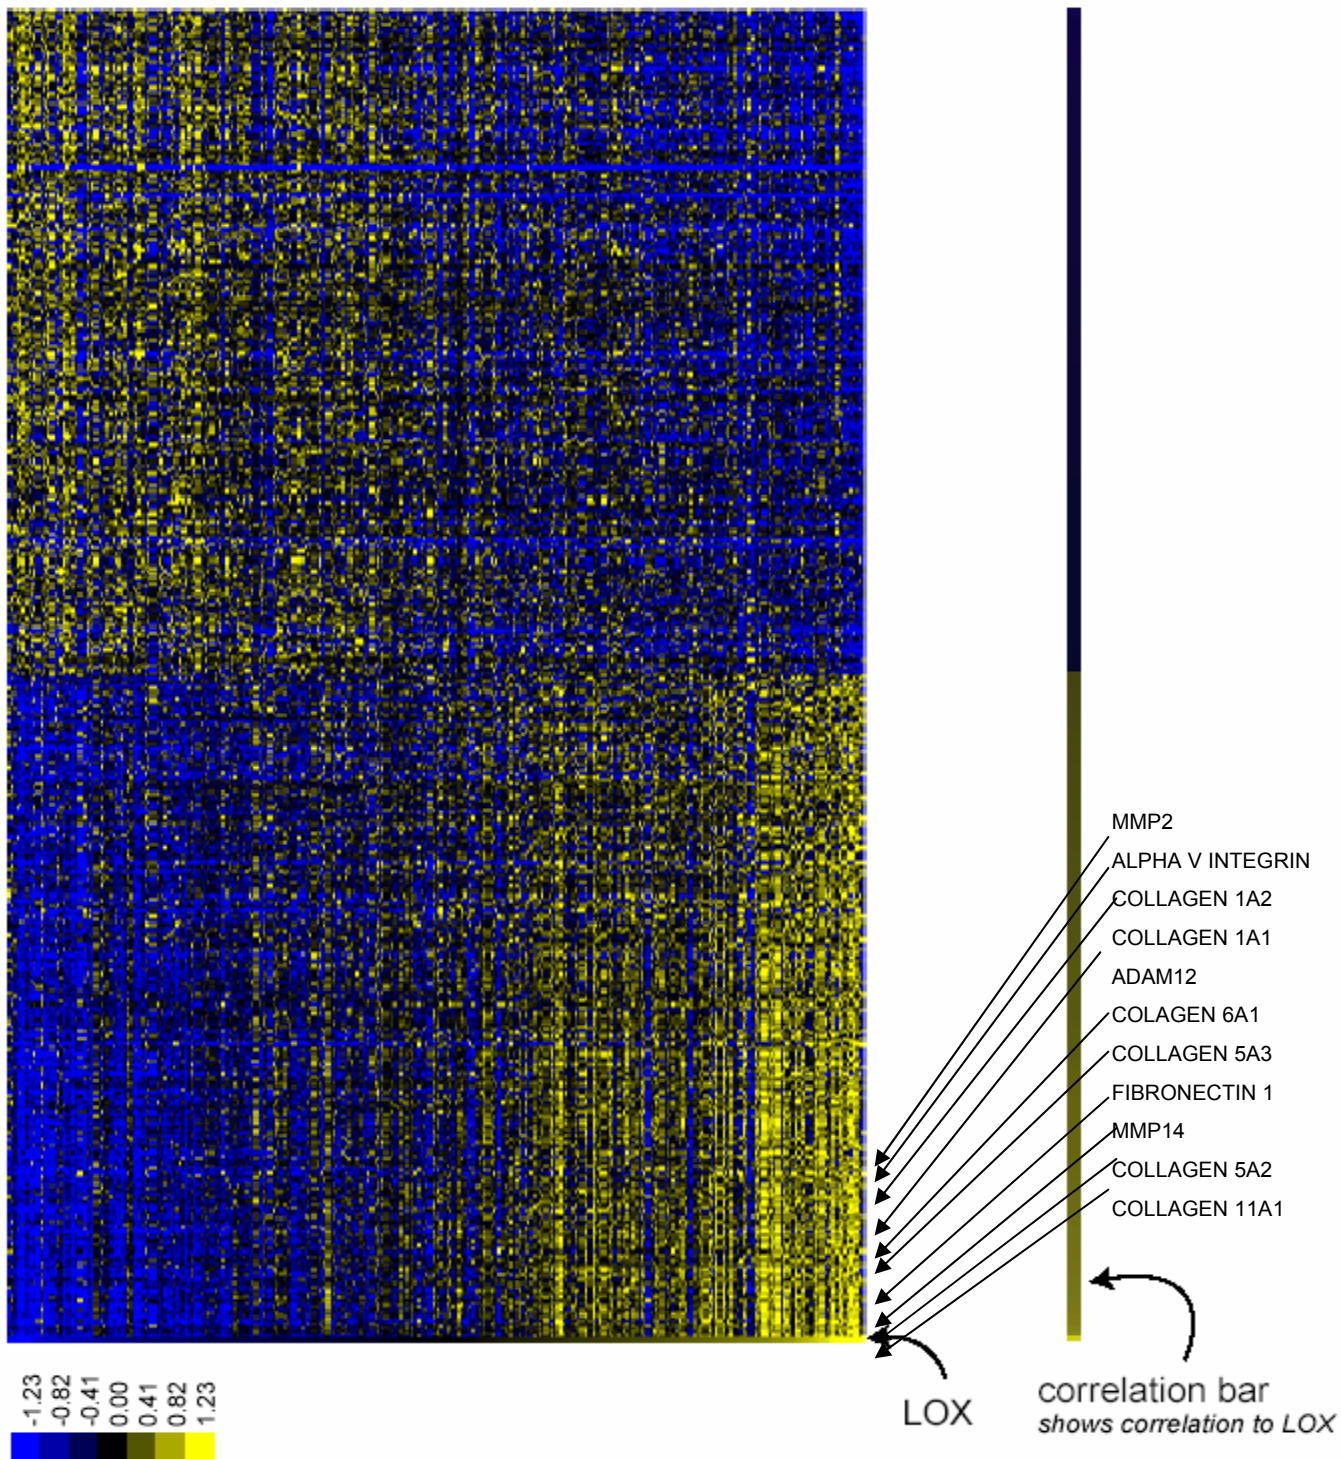

**Supplementary Figure 2: Genes with strong correlation to LOX in human breast cancer patients.**  
 Generated employing previously published dataset10. Genes with standard deviation of >70% of all possible standard deviations were isolated and correlated with LOX. Only genes either in the top 95th percentile (ie most correlated) or bottom 5th percentile of all correlations to LOX were retained. Genes were then sorted by their correlation to LOX to generate a pcl file displayed here as a heatmap where blue indicates most anticorrelated and yellow indicates most strongly correlated. Genes were not mean centered. Genes of interest from the top 50 most correlated genes are highlighted with arrows. Full list available online (Excel Book1).
