# Supplementary material for: Lysyl oxidase is essential for hypoxia-induced metastasis
Source: Springer Nature journal article supplement (doi:10.1038/nature04695), 2006-04-27
Supplement: 41586_2006_BFnature04695_MOESM5_ESM.pdf [file 41586_2006_BFnature04695_MOESM5_ESM.pdf]

# NKI ER NEGATIVE TUMORS ONLY

SAMPLE.28  
 SAMPLE.29  
 SAMPLE.308  
 SAMPLE.378  
 SAMPLE.374  
 SAMPLE.144  
 SAMPLE.310  
 SAMPLE.109  
 SAMPLE.350  
 SAMPLE.270  
 SAMPLE.149  
 SAMPLE.8  
 SAMPLE.396  
 SAMPLE.135  
 SAMPLE.130  
 SAMPLE.226  
 SAMPLE.222  
 SAMPLE.268  
 SAMPLE.186  
 SAMPLE.269  
 SAMPLE.181  
 SAMPLE.103  
 SAMPLE.402  
 SAMPLE.333  
 SAMPLE.307  
 SAMPLE.265  
 SAMPLE.141  
 SAMPLE.177  
 SAMPLE.321  
 SAMPLE.274  
 SAMPLE.312  
 SAMPLE.312  
 SAMPLE.330  
 SAMPLE.76  
 SAMPLE.7  
 SAMPLE.195  
 SAMPLE.158  
 SAMPLE.236  
 SAMPLE.335  
 SAMPLE.237  
 SAMPLE.246  
 SAMPLE.257  
 SAMPLE.217  
 SAMPLE.202  
 SAMPLE.147  
 SAMPLE.341  
 SAMPLE.277  
 SAMPLE.276  
 SAMPLE.175  
 SAMPLE.136  
 SAMPLE.98  
 SAMPLE.126  
 SAMPLE.164  
 SAMPLE.344  
 SAMPLE.194  
 SAMPLE.113  
 SAMPLE.238  
 SAMPLE.228  
 SAMPLE.241  
 SAMPLE.71  
 SAMPLE.338  
 SAMPLE.179  
 SAMPLE.75  
 SAMPLE.153  
 SAMPLE.197  
 SAMPLE.230  
 SAMPLE.12  
 SAMPLE.215

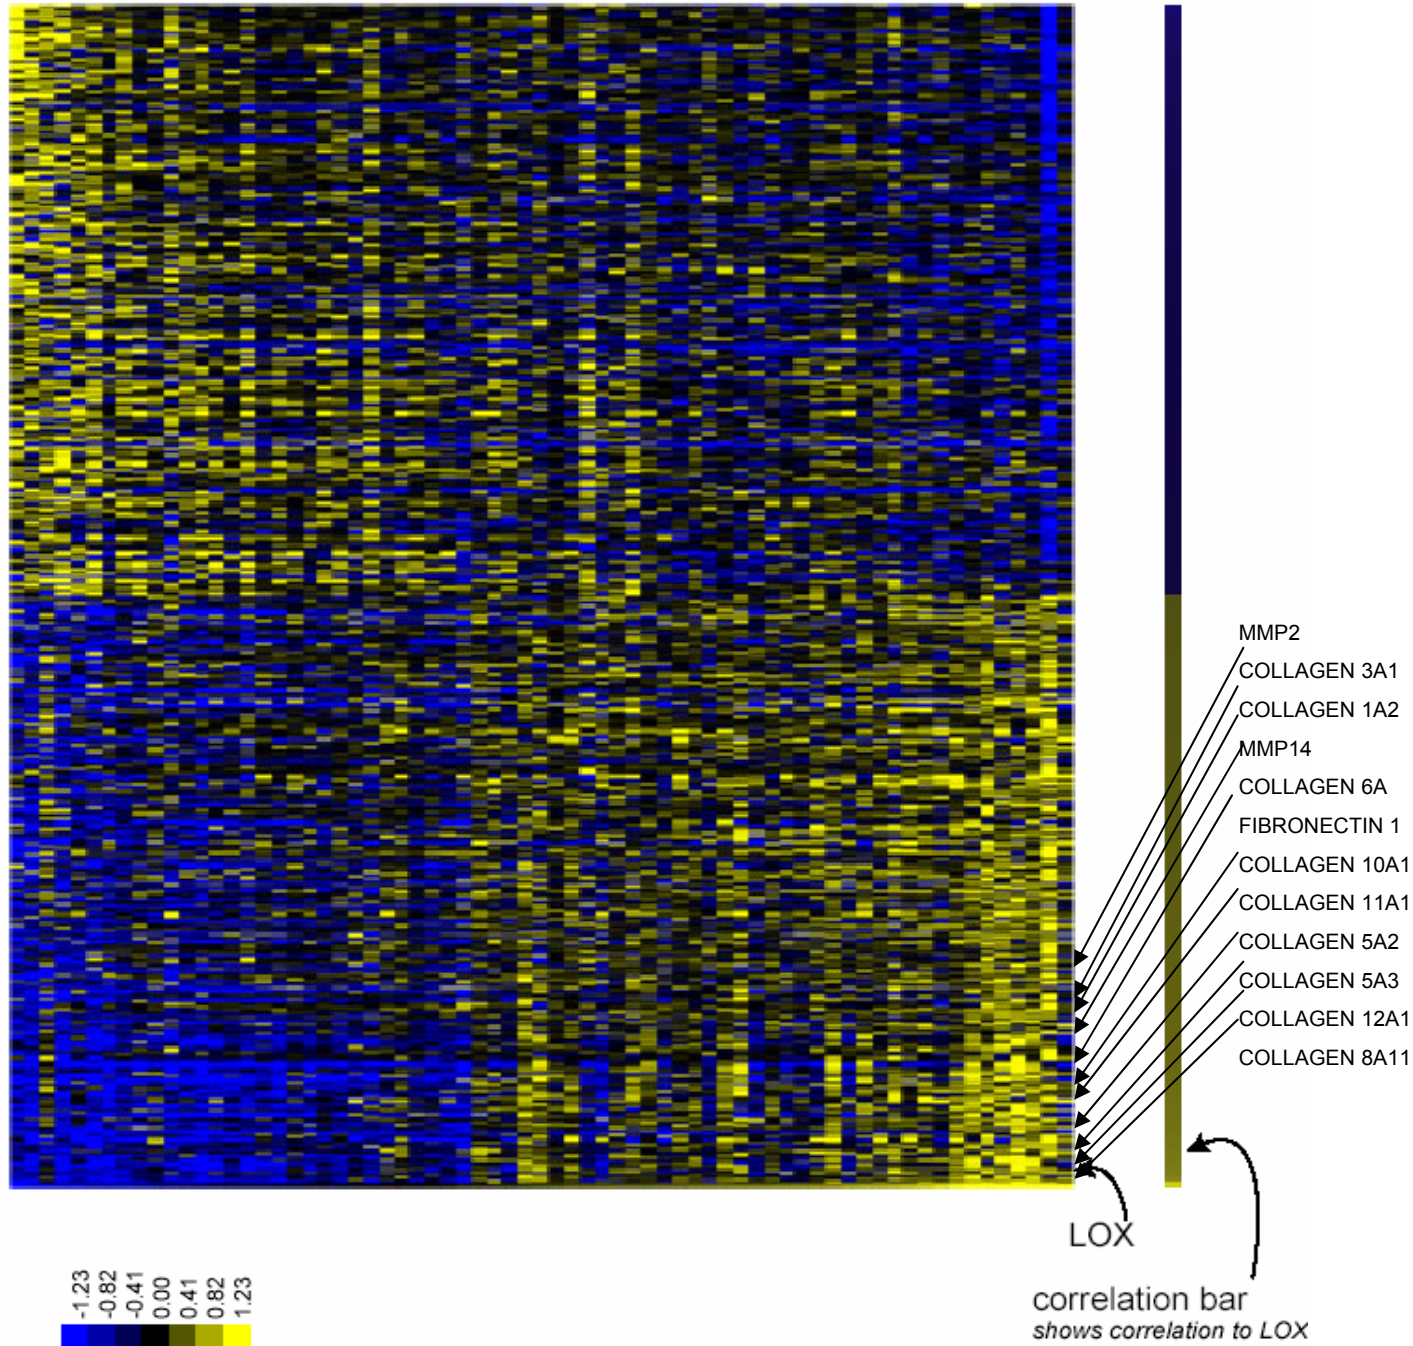

**Supplementary Figure 3: Genes with strong correlation to LOX in human breast cancer patients bearing ER-negative tumors.**

Generated employing previously published dataset10 only for patients with ER-negative tumors. Genes with standard deviation of >70% of all possible standard deviations were isolated and correlated with LOX. Only genes either in the top 95th percentile (ie most correlated) or bottom 5th percentile of all correlations to LOX were retained. Genes were then sorted by their correlation to LOX to generate a pcl file displayed here as a heatmap where blue indicates most anticorrelated and yellow indicates most strongly correlated. Genes were not mean centered. Genes of interest from the top 50 most correlated genes are highlighted with arrows. Full list available online (Excel Book2).
