# Supplementary material for: Lysyl oxidase is essential for hypoxia-induced metastasis
Source: Springer Nature journal article supplement (doi:10.1038/nature04695), 2006-04-27
Supplement: 41586_2006_BFnature04695_MOESM7_ESM.pdf [file 41586_2006_BFnature04695_MOESM7_ESM.pdf]

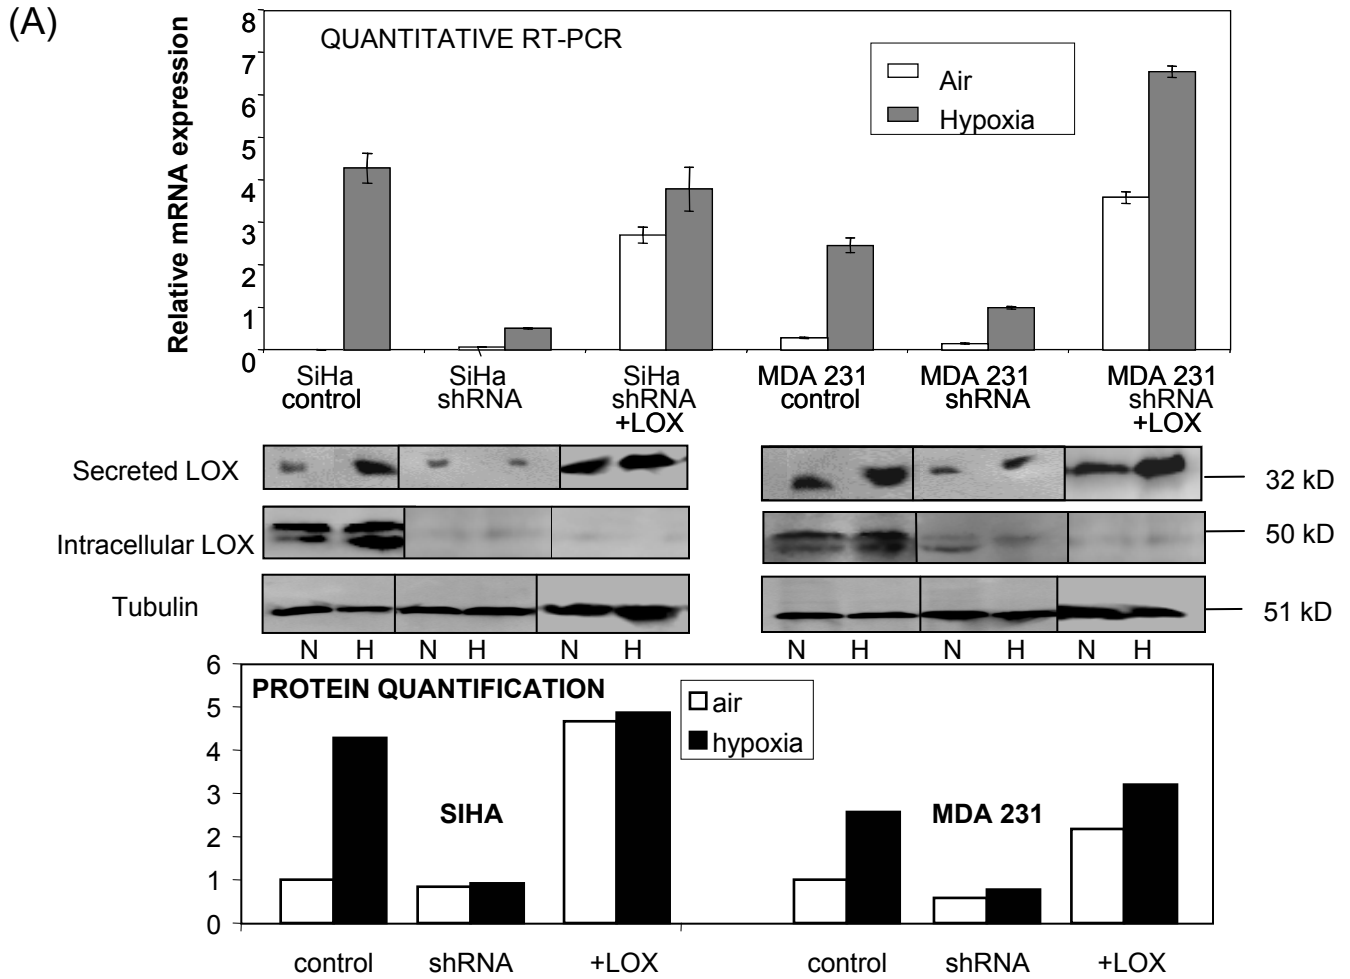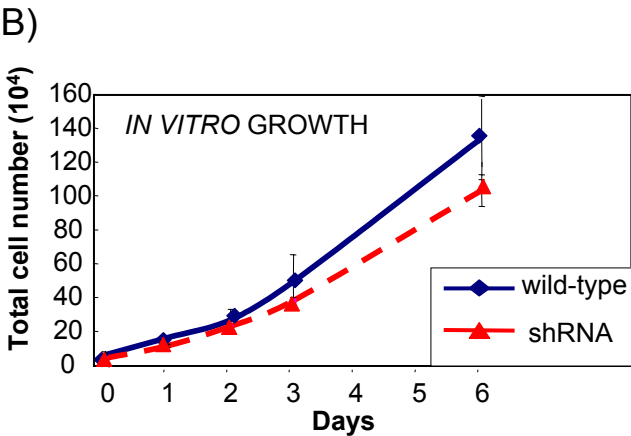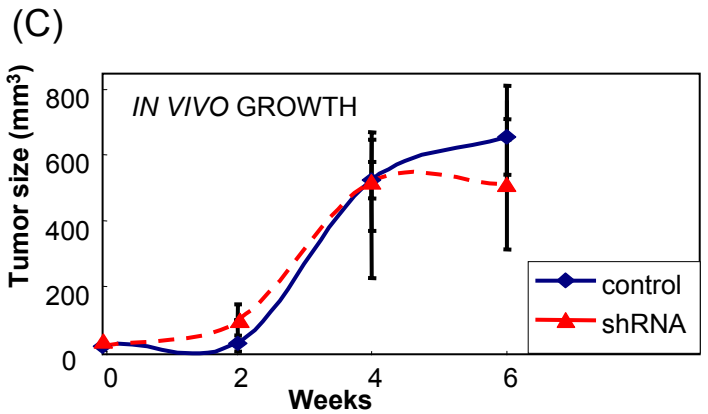

**Supplementary Figure 4: Characterization of cells expressing LOX shRNA.**

**(A)** LOX mRNA and protein expression levels were examined in cells expressing shRNA specific to LOX (shRNA) or a scrambled control sequence (control), and compared with those of shRNA cells transfected with mature LOX (+LOX). The 50 and 52kDa bands are pro-LOX; 30kDa is mature processed LOX<sup>30</sup>.

**(B+C)** MDA231 wild-type (solid line) and LOX shRNA expressing (dashed line) growth curves. Both cell types had a similar distribution of cells in the different phases of the cell cycle with and without serum, and whether in air or hypoxia (data not shown). Data are plotted as mean  $\pm$  standard error. N=15 mice.
