# Supplementary material for: Lysyl oxidase is essential for hypoxia-induced metastasis
Source: Springer Nature journal article supplement (doi:10.1038/nature04695), 2006-04-27
Supplement: 41586_2006_BFnature04695_MOESM8_ESM.pdf [file 41586_2006_BFnature04695_MOESM8_ESM.pdf]

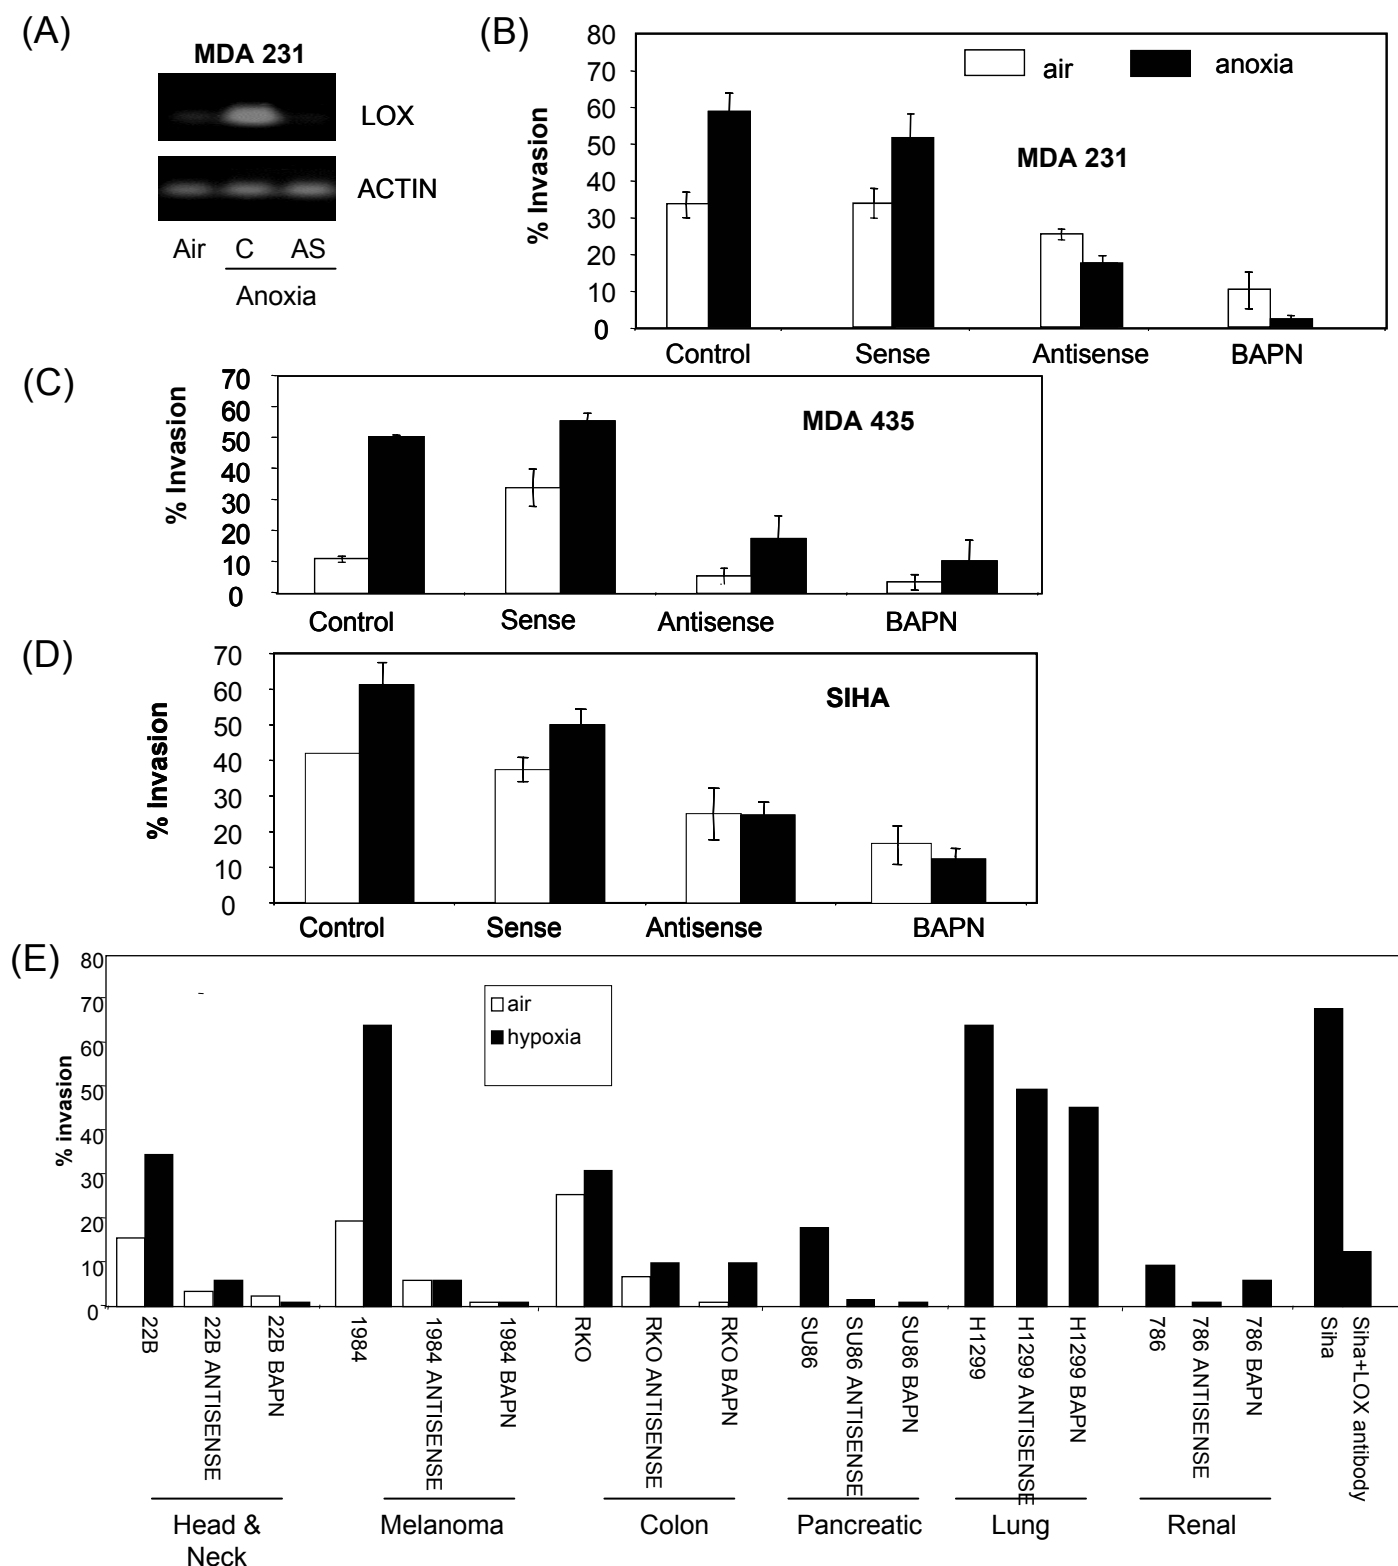

**Supplementary Figure 5: Role for LOX in invasion under anoxic conditions and in other cell types.**

**(A)** Decreased LOX mRNA levels in antisense (AS) treated cells were verified by semi-quantitative RT-PCR by comparing levels to control (C) cells in normoxia (air) and anoxia.

**(B-E)** *In vitro* invasion assays were performed using cells treated with LOX antisense or sense phosphorothioate-modified oligonucleotides, or with BAPN, prior to incubation in normoxia (white bars) or anoxia (black bars). Results representative of at least three independent experimental repeats (plotted as mean  $\pm$  standard error).
