# Supplementary material for: Lysyl oxidase is essential for hypoxia-induced metastasis
Source: Springer Nature journal article supplement (doi:10.1038/nature04695), 2006-04-27
Supplement: 41586_2006_BFnature04695_MOESM9_ESM.pdf [file 41586_2006_BFnature04695_MOESM9_ESM.pdf]

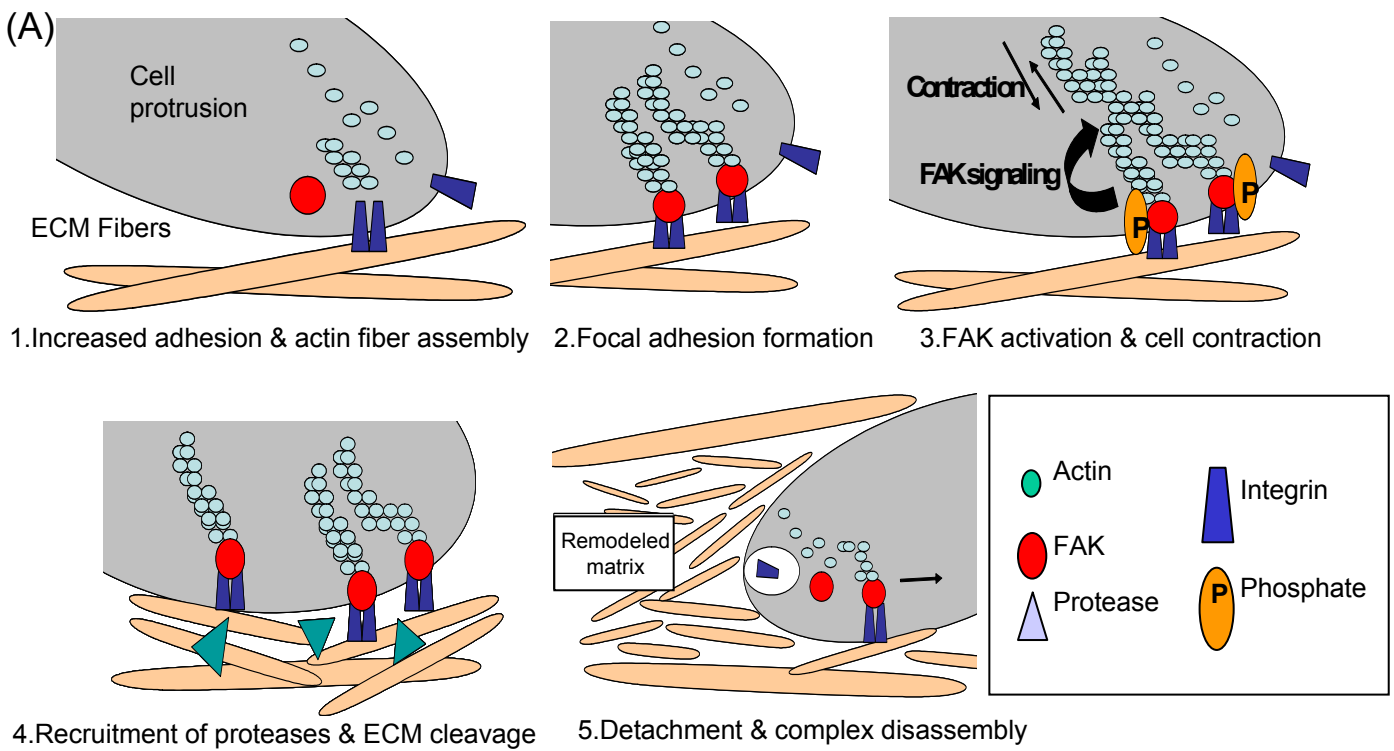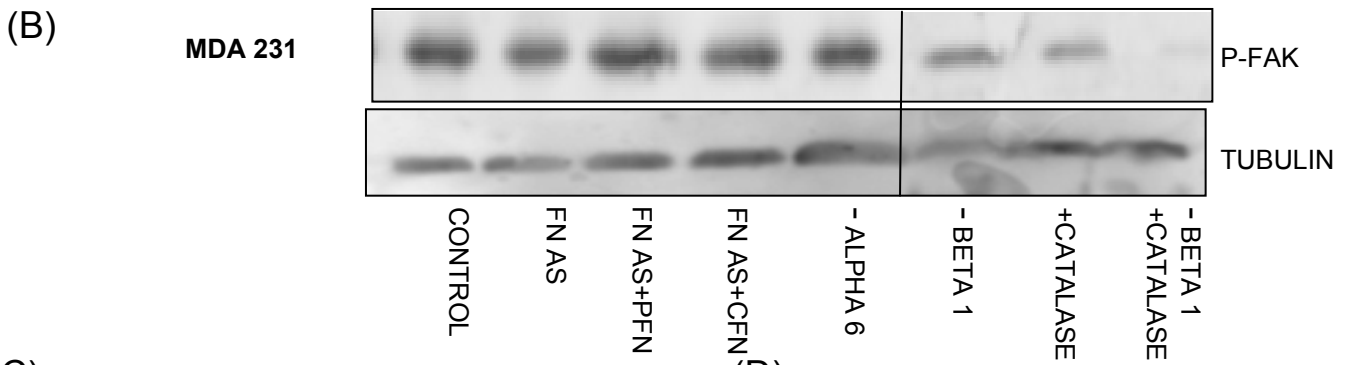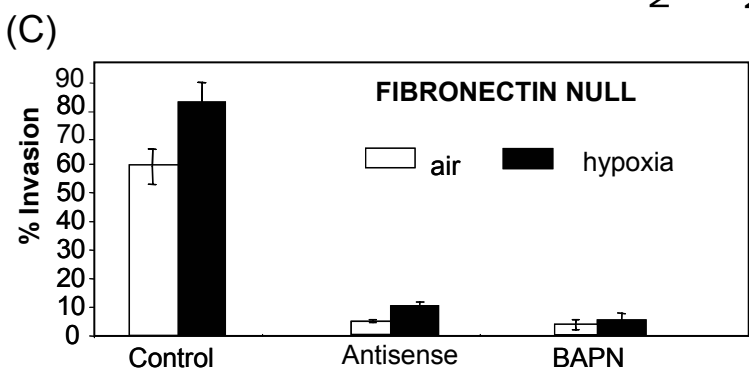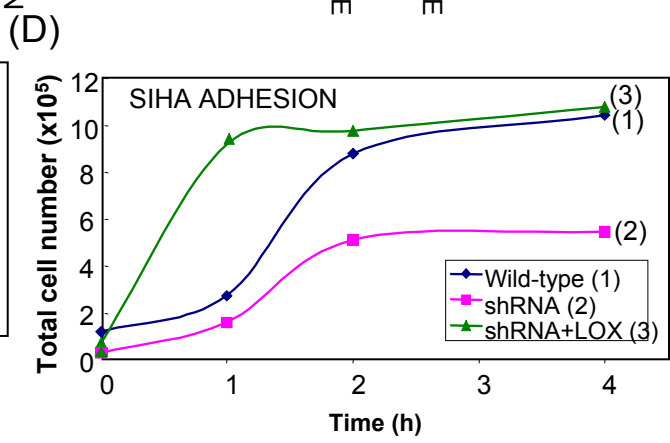

**Supplementary Figure 6: LOX inhibition prevents cell invasion.**

**(A)** Multi-step process of EMT migration (details in text, adapted from<sup>17</sup>).

**(B)** Immunoblot performed to examine FAK phosphorylation in MDA231 cells transfected with FN antisense oligos (FN AS) with the addition of plasma (p)FN or cellular (c)FN, or incubated with an alpha-6 or beta-1 integrin blocking antibody, or catalase, or both catalase and beta-1 antibody.

**(C)** Fibronectin null mouse embryonic fibroblasts were subjected to *in vitro* invasion assays. Untreated invasion was compared with that of cells transfected with LOX antisense oligos (Antisense) or incubated with BAPN.

**(D)** Adhesion of SiHa cells expressing DSRED to matrix was assessed over time.
