# Supplementary material for: Lysyl oxidase is essential for hypoxia-induced metastasis
Source: Springer Nature journal article supplement (doi:10.1038/nature04695), 2006-04-27
Supplement: 41586_2006_BFnature04695_MOESM10_ESM.pdf [file 41586_2006_BFnature04695_MOESM10_ESM.pdf]

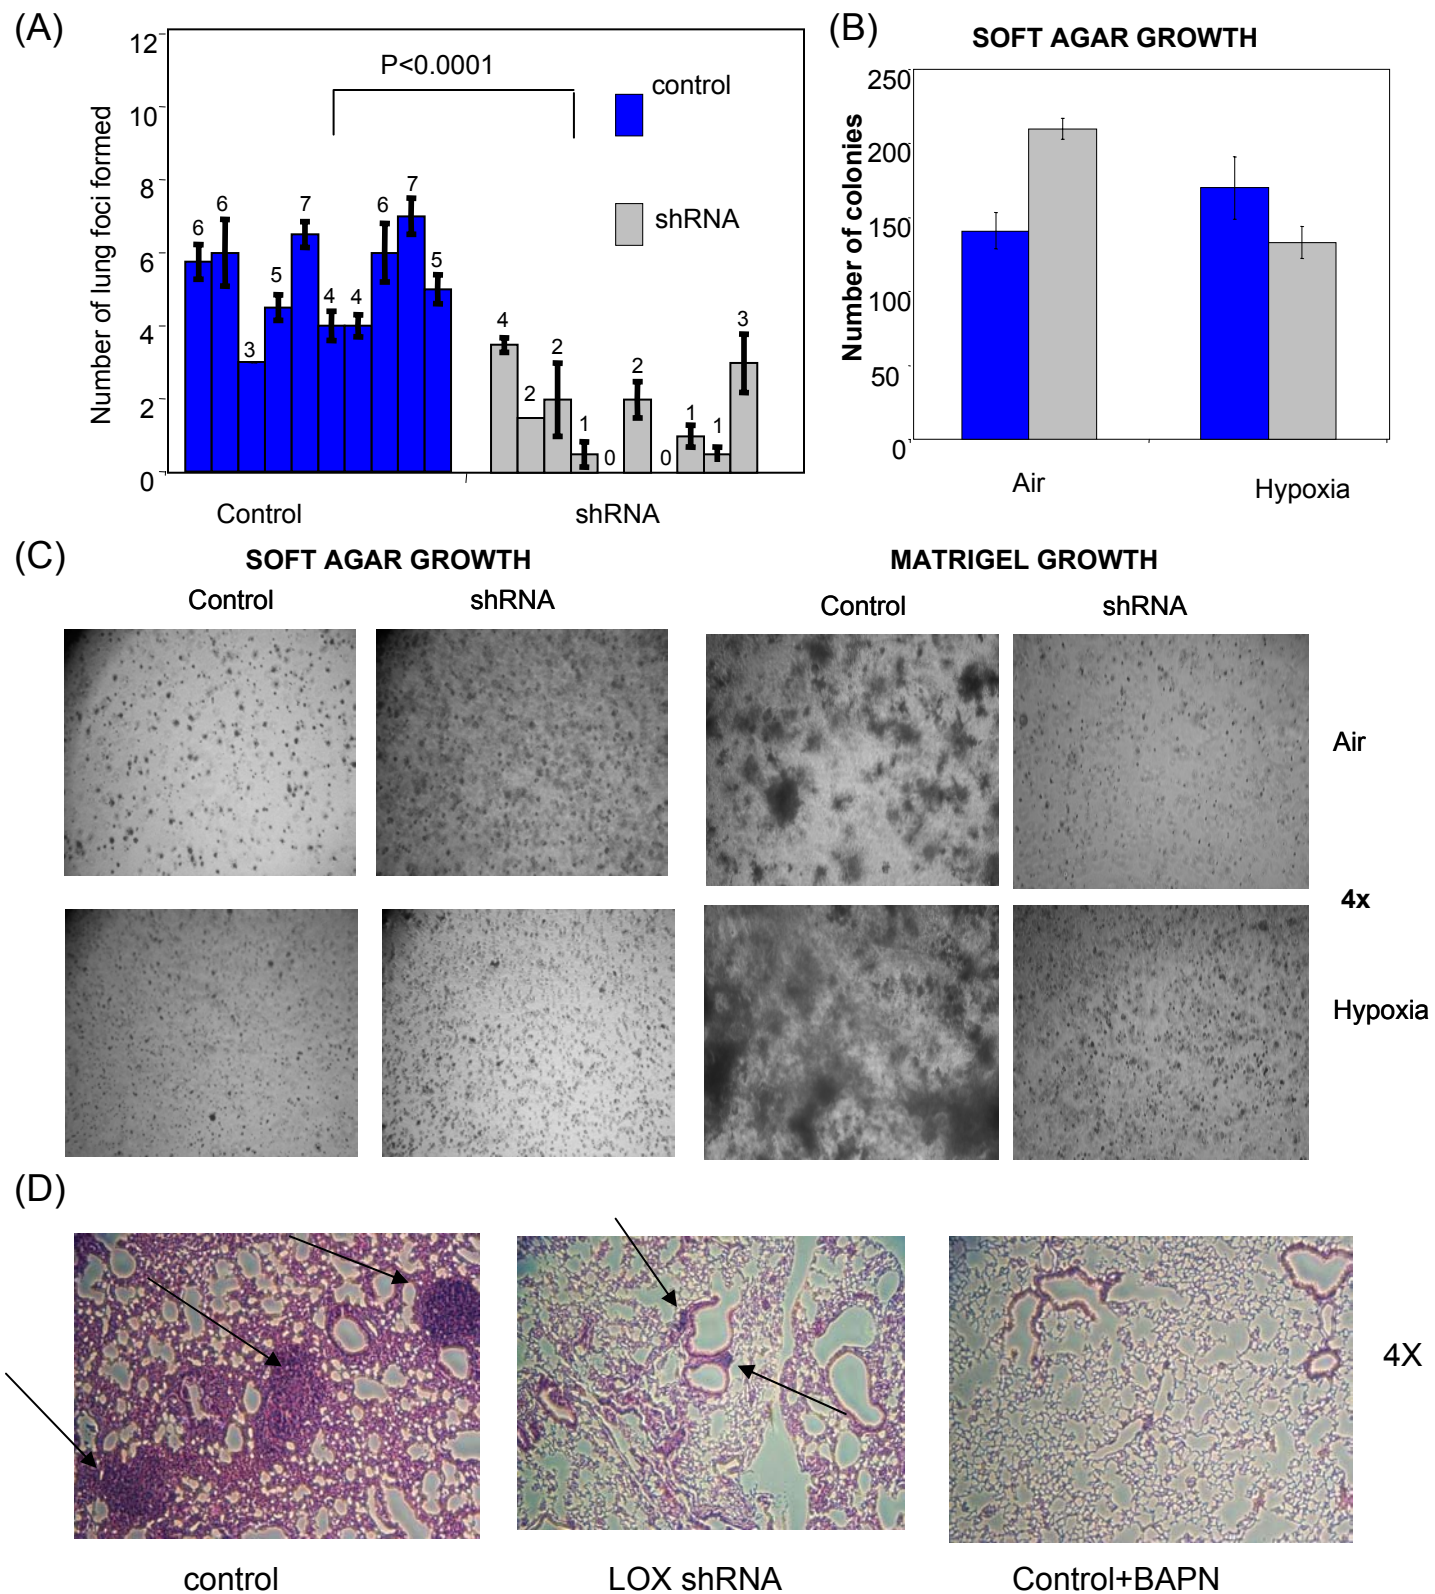

**Supplementary Figure 7: LOX is required for abundant metastatic growth through cluster formation and permissive niche initiation.**

**(A)** Tail vein metastasis assays using LOX shRNA or control MDA231 cells. Data are plotted as the mean number of lung foci per mouse  $\pm$  standard error for the ten step sections, based on two independent experimental repeats.

**(B+C)** MDA231 control or LOX shRNA cells were grown in soft agar or in Matrigel for 10 days at normoxic or hypoxic conditions. Average number of colonies per 10x field of view are plotted.

**(D)** H&E staining of mouse lung sections demonstrating differing sizes of metastatic lesions formed (indicated with arrows).
